# Supplementary material for: PdII on Guanidine-Functionalized Fe3O4 Nanoparticles as an Efficient Heterogeneous Catalyst for Suzuki–Miyaura Cross-Coupling and Reduction of Nitroarenes in Aqueous Media
Source: PubMed Central journal article supplement — ACS Omega. 2021 Dec 9;6(50):34416–28. doi: 10.1021/acsomega.1c04528 (PMC8697406; doi:10.1021/acsomega.1c04528), 2021-12-09
Supplement: ao1c04528_si_001.pdf [file ao1c04528_si_001.pdf]

**Pd<sup>II</sup> on guanidine functionalized Fe<sub>3</sub>O<sub>4</sub> nanoparticles as efficient heterogeneous catalyst for Suzuki-Miyaura cross-coupling and reduction of nitroarenes in aqueous media**

Guddappa Halligudra<sup>1</sup>, Chitrabanu C. Paramesh<sup>1</sup>, Ravi Mudike<sup>1,2</sup>, Mallesha Ningegowda, Dinesh Rangappa<sup>1\*</sup>,  
Prasanna D. Shivaramu<sup>1\*</sup>

<sup>1</sup>*Department of Applied Sciences, Visvesvaraya Technological University, Center for Postgraduate Studies, Bengaluru Region, Muddenahalli, Chikkaballapur District -562 101, INDIA.*

<sup>2</sup>*Solar Resource Assessment Division, National Institute of Solar Energy, Gwal Pahari, Gurugram-122 003, Haryana, INDIA*

<sup>3</sup>*SRI RAM CHEM , R & D Centre , Plot No. 31, JCK Industrial Park, Belagola Industrial Area , Mysore 570016 , INDIA*

\*E-mail: [dineshrangappa@gmail.com](mailto:dineshrangappa@gmail.com); [prasuds@gmail.com](mailto:prasuds@gmail.com); [prasannads@vtu.ac.in](mailto:prasannads@vtu.ac.in)

**Table of Content**

| <b>SI. No.</b> | <b>Content</b>                                                                                                                                        | <b>Page No.</b> |
|----------------|-------------------------------------------------------------------------------------------------------------------------------------------------------|-----------------|
| <b>SI 1</b>    | Hot filtration and leaching test of Fe <sub>3</sub> O <sub>4</sub> @Guanidine-Pd for Suzuki–Miyaura cross-coupling and nitroarene reduction reactions | <b>S2</b>       |
| <b>SI 2</b>    | Photocopy of the separation of the catalyst by an external magnet                                                                                     | <b>S2</b>       |
| <b>SI 3</b>    | A plausible mechanism for the Suzuki–Miyaura cross-coupling and nitroarene reduction reactions                                                        | <b>S3</b>       |
| <b>SI 4</b>    | General Information and characterization data of products                                                                                             | <b>S4-S9</b>    |
| <b>SI 5</b>    | <sup>1</sup> H NMR spectra of the selected products are given in Table 2 in the main manuscript are presented here                                    | <b>S10-S14</b>  |
| <b>SI 6</b>    | <sup>1</sup> H NMR spectra of the selected products are given in Table 4 in the main manuscript are presented here                                    | <b>S15-S27</b>  |

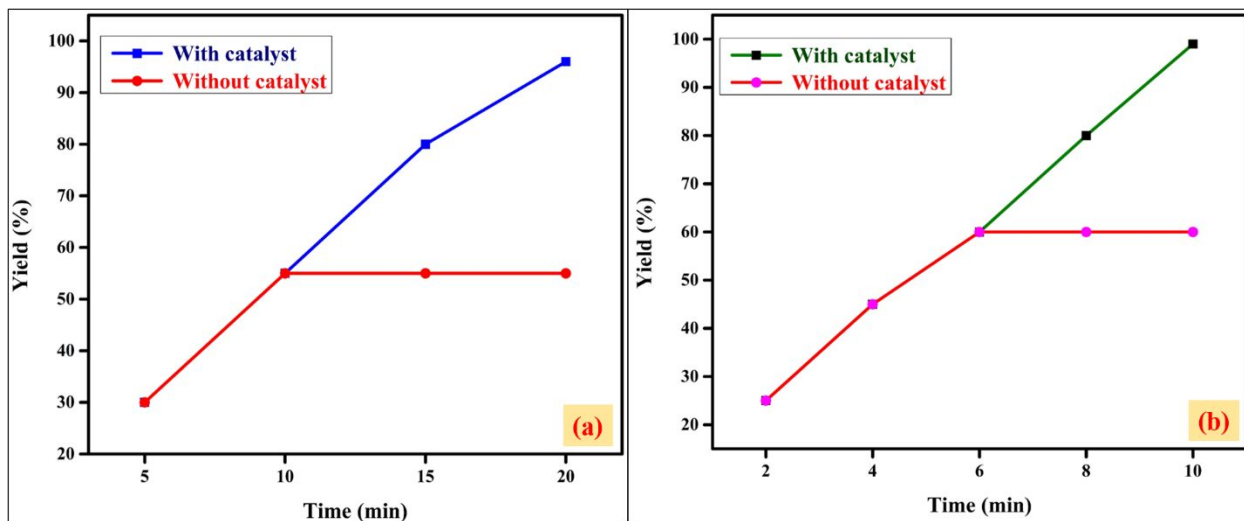

**Figure S1.** Hot filtration and leaching test of  $\text{Fe}_3\text{O}_4@\text{Guanidine-Pd}$  in the (a) Suzuki–Miyaura cross-coupling and (b) nitrobenzene reduction reactions.

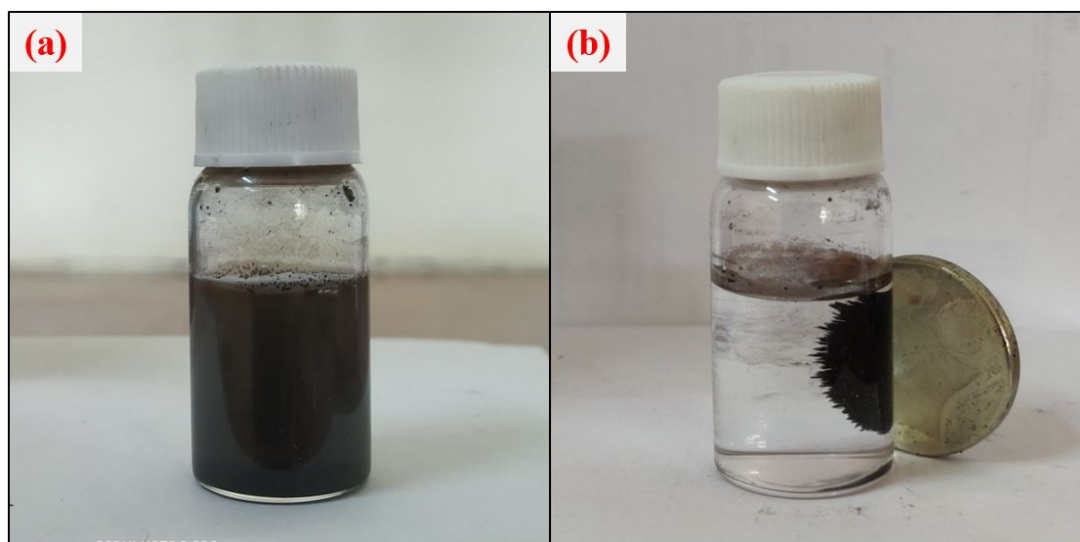

**Figure S2.** Magnetic removal of the catalyst after the catalytic run (a) after catalyzing reaction (b) separation of the catalyst using an external magnet.

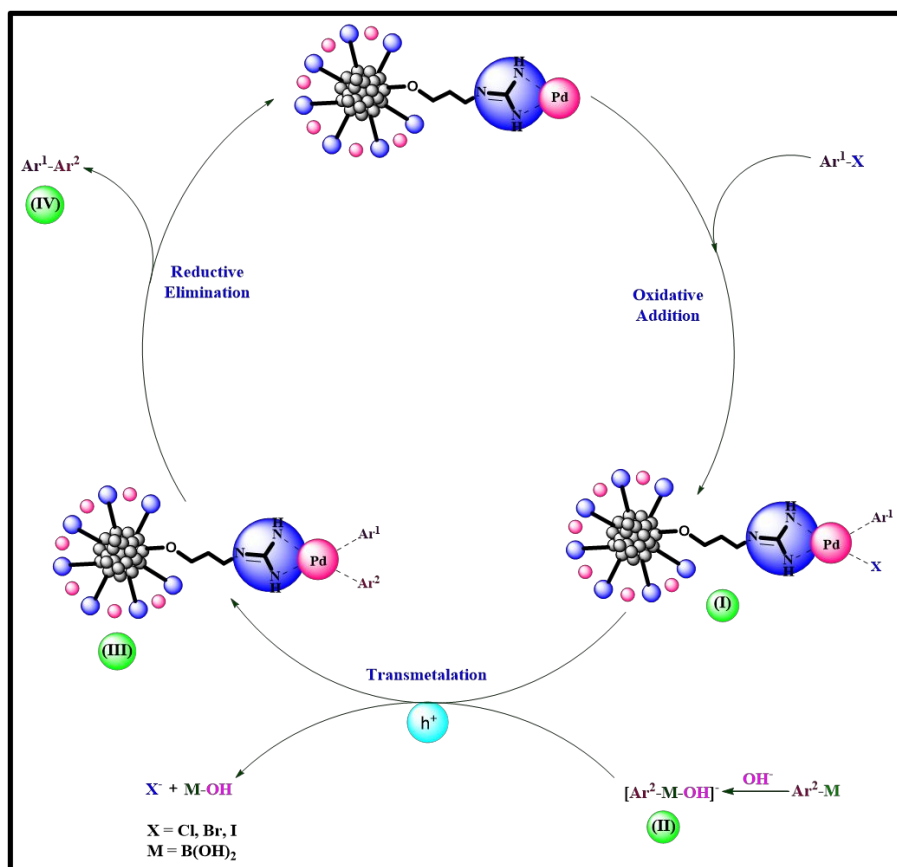

**Figure S3.** A plausible mechanism for the Suzuki–Miyaura cross-coupling reaction

A plausible mechanism for the Suzuki–Miyaura cross-coupling reaction catalyzed by  $Fe_3O_4@Guanidine-Pd$  in aqueous media.

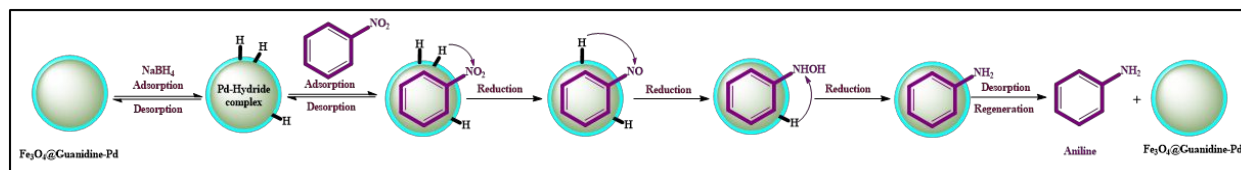

**Figure S4.** A plausible mechanism for the reduction of nitroarenes

A plausible mechanism for the reduction of nitro compounds to corresponding amines with  $NaBH_4$  catalyzed by  $Fe_3O_4@Guanidine-Pd$  in aqueous media at room temperature.

## General Information

All chemicals were purchased from diverse commercial sources and were used without further purification. The reaction was monitored by thin layer chromatography using Silica gel 60 F<sub>254</sub> Plates. Products were purified by column chromatography on 100–200 mesh silica gel. The <sup>1</sup>H NMR spectra were recorded on 400 MHz spectrometers in DMSO and CDCl<sub>3</sub> using tetramethylsilane (TMS) as an internal standard. Chemical shifts were reported in parts per million (δ) relative to tetramethylsilane as an internal standard. The splitting patterns of protons are described as s (singlet), d (doublet), dd (doublet of doublets), t (triplet) and m (multiplet). The products were confirmed by <sup>1</sup>H NMR spectroscopic analysis.

**Characterization data of products** (yields are corresponding to the Suzuki coupling and reduction of nitroarenes reactions given in Table 2 and Table 4)

### Biphenyl

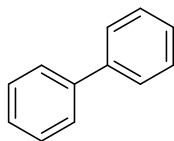

Yield: 96%, White solid; m.p. 69-72 °C; <sup>1</sup>H NMR (400 MHz, DMSO): δH (ppm) = 7.67-7.64 (4H, d, Ar-H), 7.487-7.443 (4H, t, Ar-H), 7.387-7.344 (2H, d, Ar-H).

### *p*-hydroxy biphenyl

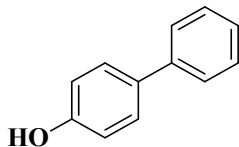

Yield: 94%, White solid; m.p. 163-165 °C; <sup>1</sup>H NMR (400 MHz, DMSO): δH (ppm) = 9.5(1H, s, -OH), 7.575-7.554(2H, dd, Ar-H), 7.495-7.459(2H, dt, Ar-H), 7.418-7.380(2H, t, Ar-H), 7.285-7.249(1H, t, Ar-H), 6.867-6.830(2H, dt, Ar-H).

***p*-bromomethyl biphenyl**

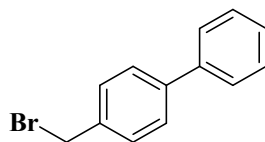

Yield: 88%, Yellow solid; m.p. 82-84 °C; <sup>1</sup>H NMR (400 MHz, DMSO): δH (ppm) = 7.763-7.641(4H, m, Ar-H), 7.6-7.5(2H, d, Ar-H), 7.479-7.441(2H, t, Ar-H), 7.410-7.345(1H, m, Ar-H), 4.795-4.758 (2H, S, -CH<sub>2</sub>-Br)

***p*-methyl biphenyl**

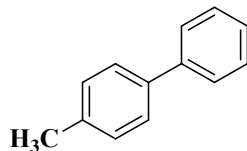

Yield: 90%, White solid; m.p. 41-44 °C; <sup>1</sup>H NMR (400 MHz, DMSO): δH (ppm) = 7.634-7.605 (d, 2H, Ar-H), 7.555-7.534 (d, 2H, Ar-H), 7.452-7.414 (t, 2H, Ar-H), 7.345-7.34 (d, 1H, Ar-H), 7.329-7.251 (q, 2H, Ar-H), 2.347-2.332 (S, 3H, -CH<sub>3</sub>).

***p*-amino biphenyl**

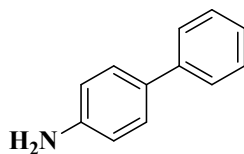

Yield: 88%, Light yellow color solid; m.p. 50-53°C; <sup>1</sup>H NMR (400 MHz, DMSO): δH (ppm) = 7.524-7.5 (dd, 2H, Ar-H) 7.368-7.325 (m, 4H, Ar-H), 7.210-7.191 (m, 1H, Ar-H), 6.630-6.609 (d, 2H, Ar-H), 5.210 (S, 2H, -NH<sub>2</sub>).

### Aniline

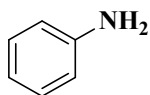

Yield: 99%; Colorless liquid; b.p. 184°C; <sup>1</sup>H NMR (400 MHz, DMSO): δH (ppm) = 7.018-6.979(2H, t, Ar-H), 6.566-6.545(1H, t, Ar-H), 6.504-6.465(2H, d, Ar-H), 3.374(2H, s, -NH<sub>2</sub>).

### *o*-aminophenol

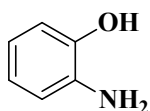

Yield: 94%; White crystals; m.p. 170-173°C; <sup>1</sup>H NMR (400 MHz, DMSO): δH (ppm) = 8.895(1H, s, -OH), 6.643-6.621(1H, dd, Ar-H), 6.591-6.510(2H, dd, Ar-H), 6.408-6.366(1H, t, Ar-H), 4.440(2H, s, -NH<sub>2</sub>).

### *m*-aminophenol

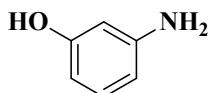

Yield: 96%; White crystals; m.p. 119-122°C; <sup>1</sup>H NMR (400 MHz, DMSO): δH (ppm) = 8.813(1H, s, -OH), 6.796-6.757(1H, t, Ar-H), 6.017-5.999(2H, d, Ar-H), 5.953-5.931(2H, dd, Ar-H), 4.846(2H, s, -NH<sub>2</sub>).

### *p*-aminophenol

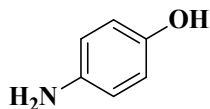

Yield: 99%; White crystalline powder; m.p. 186-189°C; <sup>1</sup>H NMR (400 MHz, DMSO): δH (ppm) = 8.314(1H, s, -OH), 6.494-6.458(2H, dd, Ar-H), 6.432-6.403(2H, dd, Ar-H), 4.36(2H, s, -NH<sub>2</sub>).

***m*-aminoacetophenone**

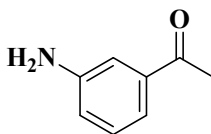

Yield: 97%; Slight yellow crystals; m.p. 96-98 °C; <sup>1</sup>H NMR (400 MHz, DMSO): δH (ppm) = 7.163-7.084 (2H, dd, Ar-H), 6.810-6.6781(2H, dd, Ar-H), 3.322(2H, s, -NH<sub>2</sub>), 2.509-2.475(3H, s, -CH<sub>3</sub>).

***p*-aminoacetophenone**

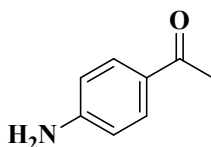

Yield: 99%; Brown crystals; m.p. 105-107 °C; <sup>1</sup>H NMR (400 MHz, CdCl<sub>3</sub>): δH (ppm) = 7.807-7.787 (2H, dd, Ar-H), 6.646-6.626(2H, dd, Ar-H), 4.161(2H, s, -NH<sub>2</sub>), 2.495(3H, s, -CH<sub>3</sub>).

***m*-chloroaniline**

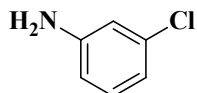

Yield: 96%; Light yellow liquid; b.p. 94-96 °C; <sup>1</sup>H NMR (400 MHz, DMSO): δH (ppm) = 7.026-6.987 (1H, t, Ar-H), 6.616-6.607(1H, dd, Ar-H), 6.523-6.487(2H, dd, Ar-H), 3.422-3.376(2H, s, -NH<sub>2</sub>),

**3,4-dichloroaniline**

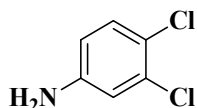

Yield: 92%; Dark brown crystals; m.p. 70-72 °C; <sup>1</sup>H NMR (400 MHz, DMSO): δH (ppm) = 7.182-7.161 (1H, m, Ar-H), 6.741-6.735(1H, d, Ar-H), 6.531-6.503(1H, dd, Ar-H), 3.345-3.324(2H, s, -NH<sub>2</sub>),

***p*-bromoaniline**

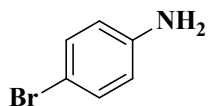

Yield: 90%; Brown solid; m.p. 66-66.5 °C; <sup>1</sup>H NMR (400 MHz, DMSO): δH (ppm) = 7.137-7.099 (2H, d, Ar-H), 6.527-6.489 (2H, d, Ar-H), 3.324 (2H, s, -NH<sub>2</sub>).

***o*-amino benzoic acid**

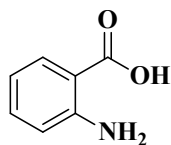

Yield: 88%; Yellow solid; m.p. 142-145°C; <sup>1</sup>H NMR (400 MHz, DMSO): δH (ppm) = 8.4 (2H, s, -NH<sub>2</sub>), 7.692-7.668 (1H, dd, Ar-H), 7.232-7.190 (1H, dt, Ar-H), 6.738-6.714 (1H, dd, Ar-H), 6.514-6.473 (1H, dt, Ar-H), 3.3 (1H, s, -OH).

***m*-amino benzoic acid**

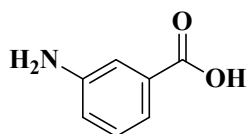

Yield: 92%; White solid; m.p. 178-180°C; <sup>1</sup>H NMR (400 MHz, DMSO): δH (ppm) = 12.45 (1H, s, -OH), 7.188-7.181 (1H, t, Ar-H), 7.131-7.073 (2H, m, Ar-H), 6.790-6.761 (1H, m, Ar-H), 5.4 (2H, s, -NH<sub>2</sub>).



***p*-amino benzoic acid**

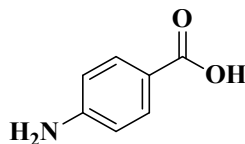

Yield: 96%; Light yellow powder; m.p. 186-188°C; <sup>1</sup>H NMR (400 MHz, DMSO): δH (ppm) = 11.932(1H, s, -OH), 7.635-7.607(2H, dd, Ar-H), 6.567-6.539(2H, dd, Ar-H), 5.856(2H, s, -NH<sub>2</sub>).

**3-methoxy-*o*-aminobenzoic acid**

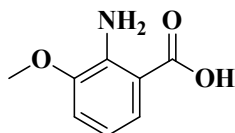

Yield: 86%; White solid; m.p. 169-170°C; <sup>1</sup>H NMR (400 MHz, DMSO): δH (ppm) = 11(1H, s, -OH), 7.622-7.599(2H, d, Ar-H), 7.163-7.145(1H, d, Ar-H), 6.484-6.446(2H, t, -NH<sub>2</sub>), 3.325 (3H, s, -CH<sub>3</sub>)

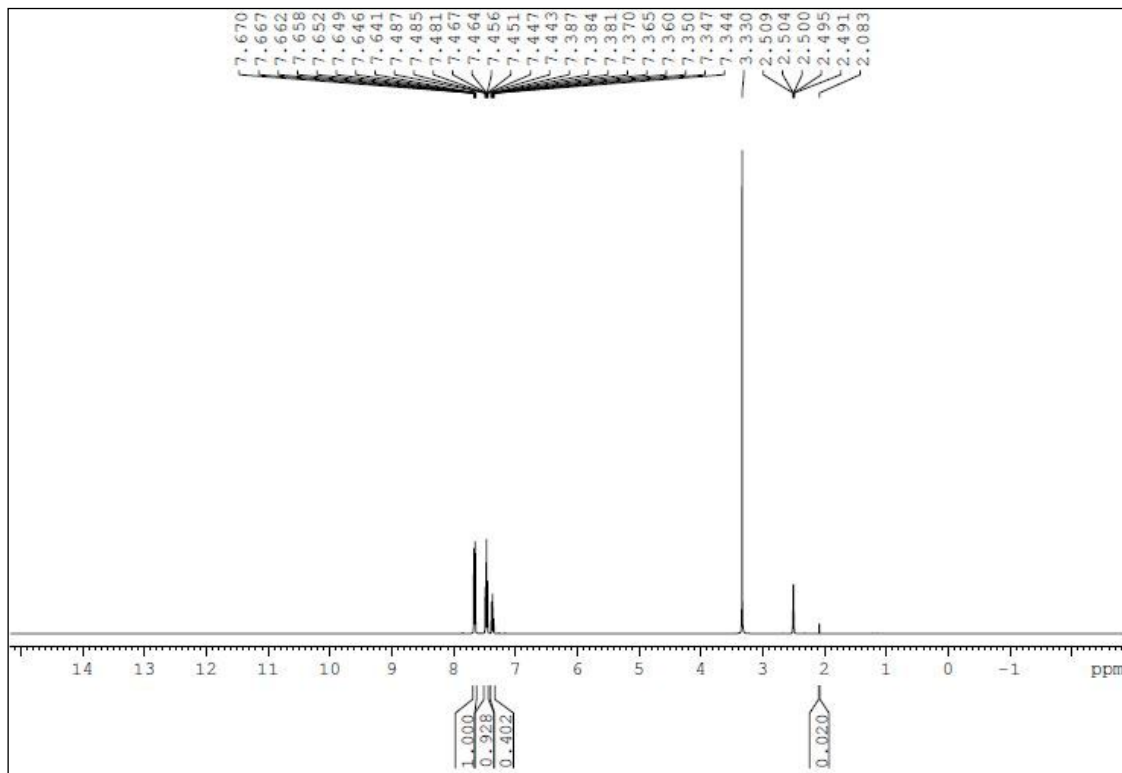

Figure S5.  $^1\text{H}$  NMR spectrum of Biphenyl

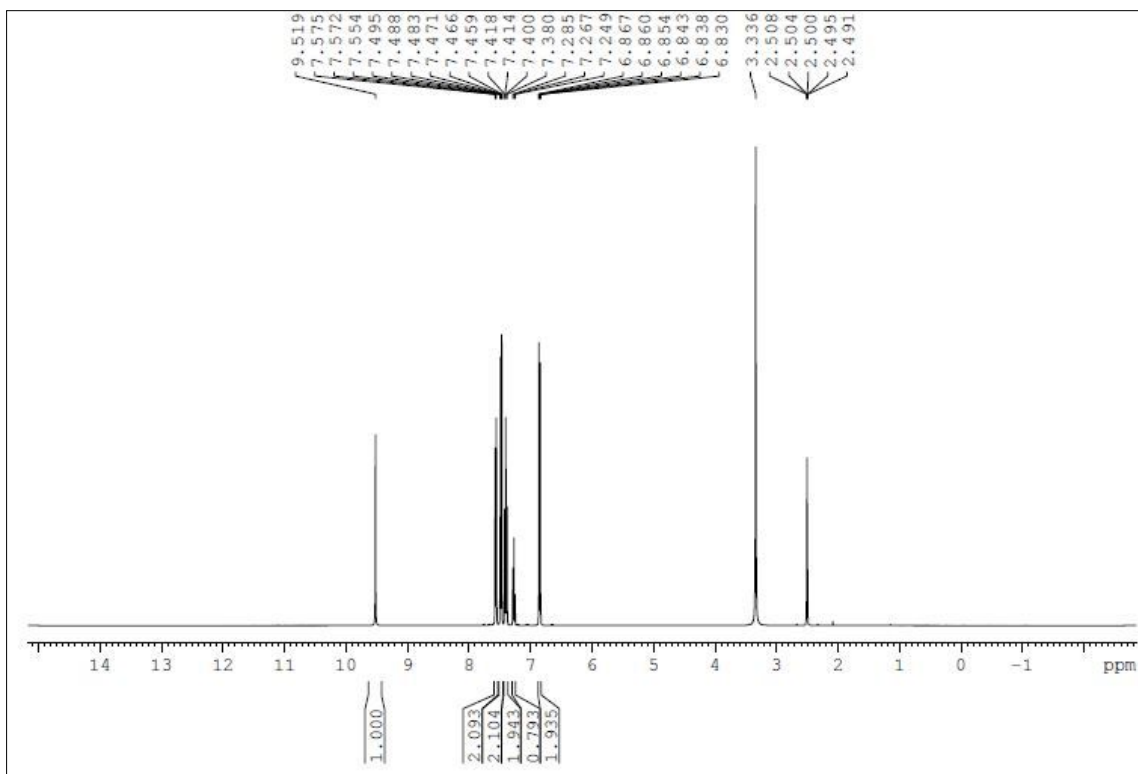

**Figure S6.**  $^1\text{H}$  NMR spectrum of *p*-hydroxy biphenyl

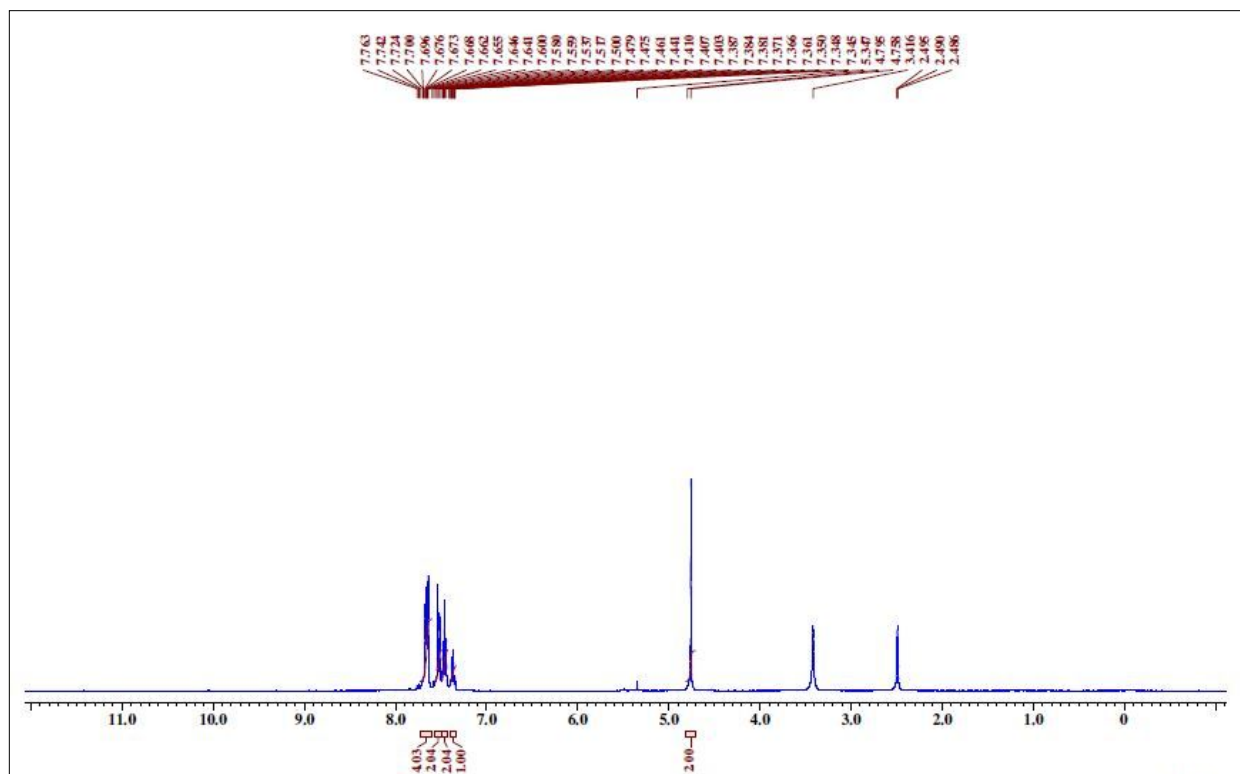

Figure S7.  $^1\text{H}$  NMR spectrum of *p*-bromomethyl biphenyl

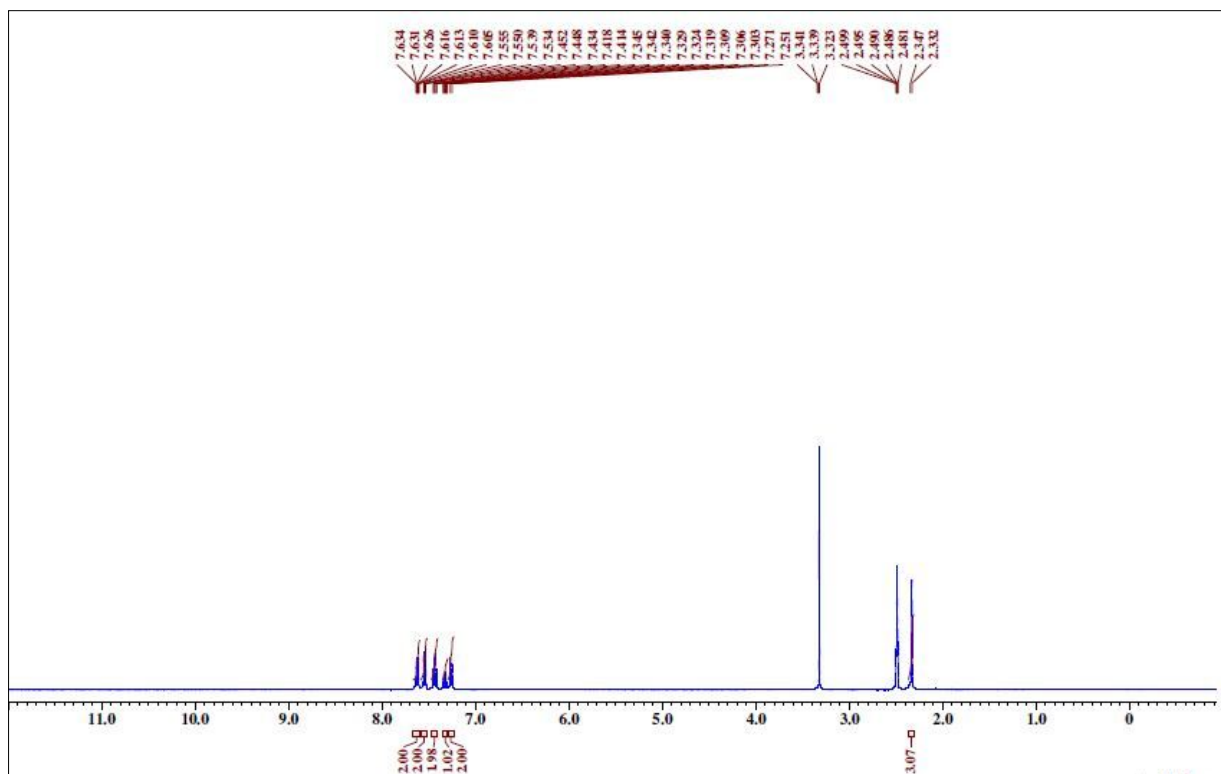

Figure S8.  $^1\text{H}$  NMR spectrum of *p*-methyl biphenyl

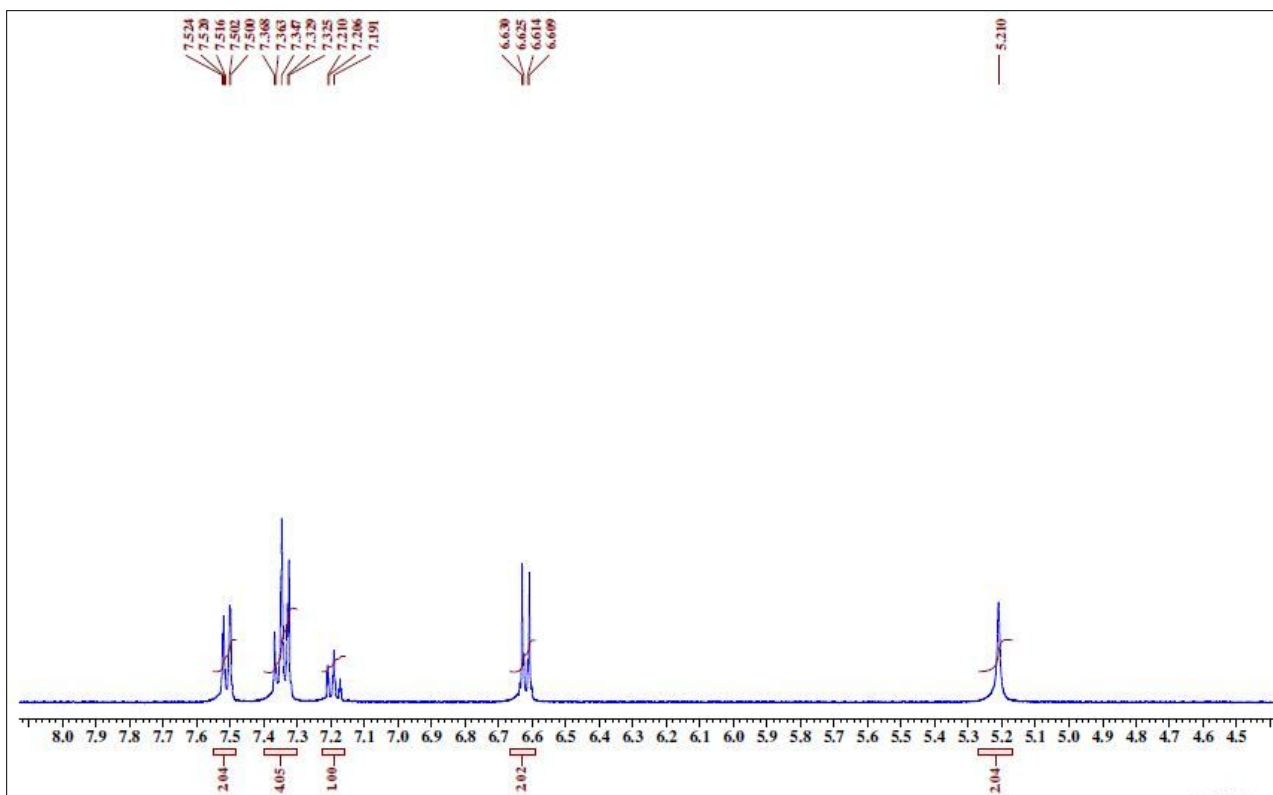

Figure S9. <sup>1</sup>H NMR spectrum of *p*-amino biphenyl

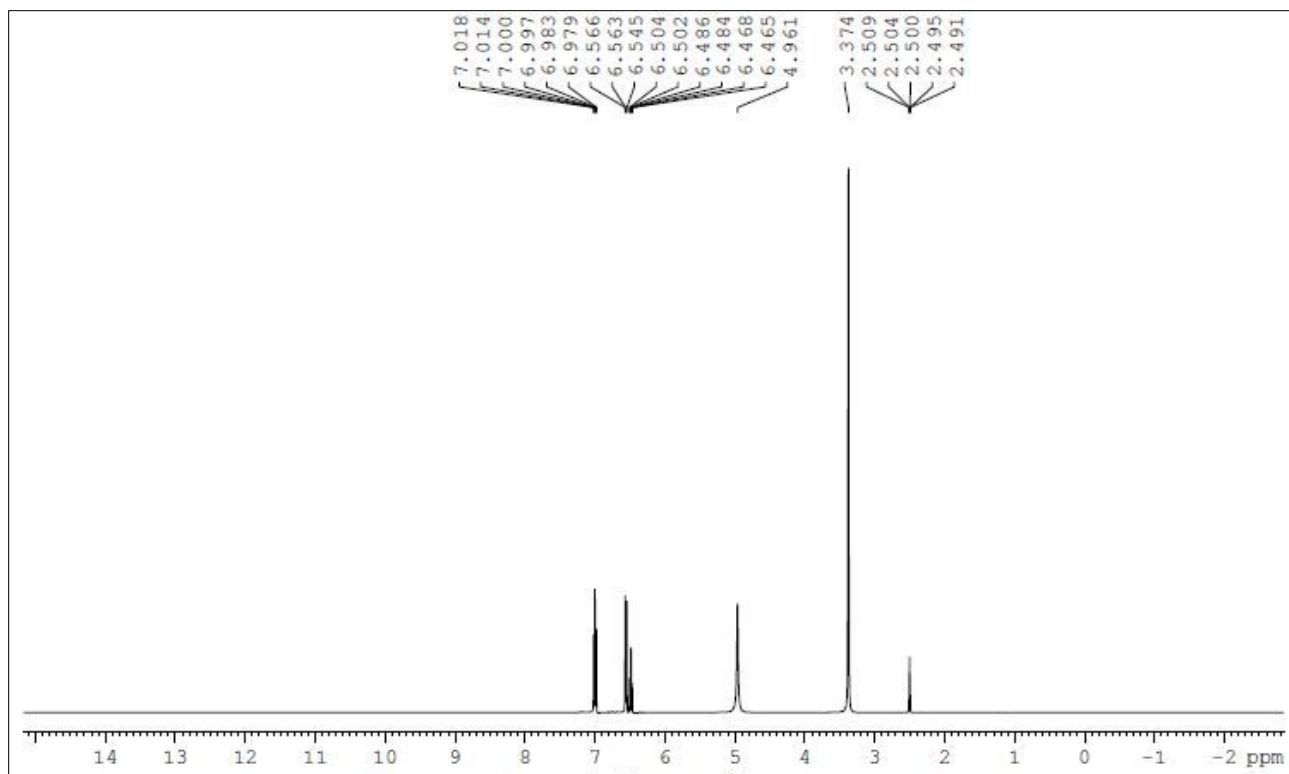

**Figure S10.** <sup>1</sup>H NMR spectrum of aniline

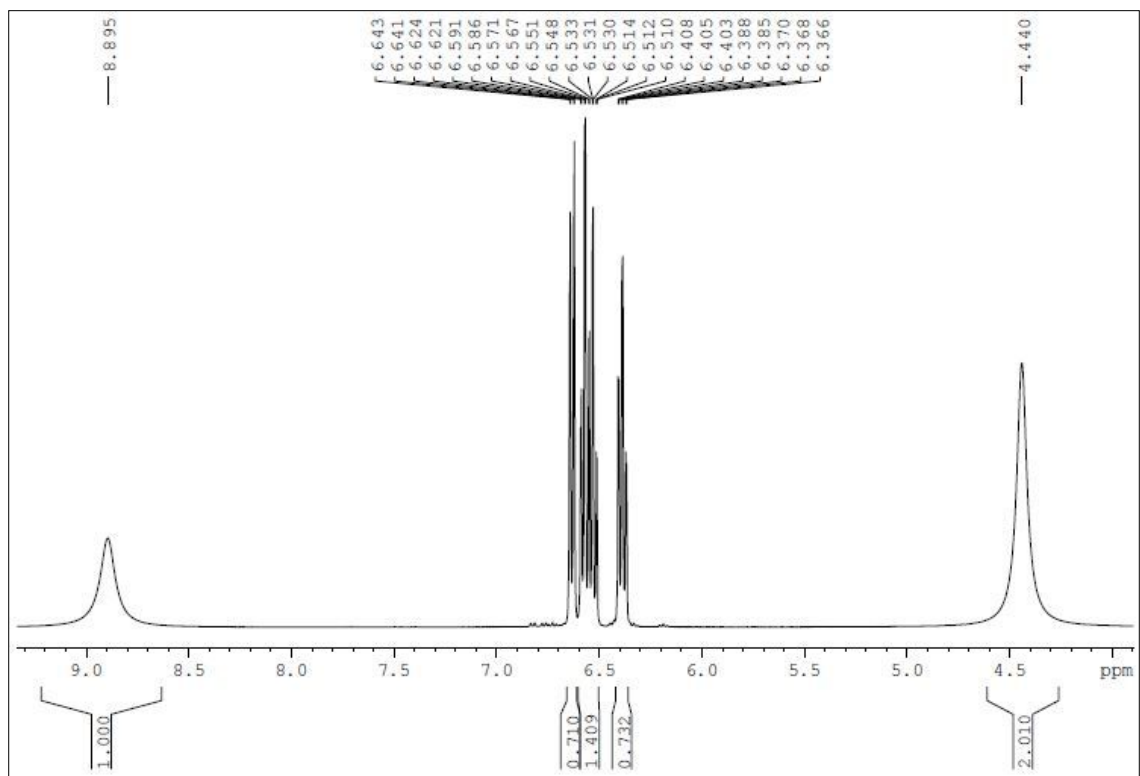

**Figure S11.** <sup>1</sup>H NMR spectrum of *o*-aminophenol



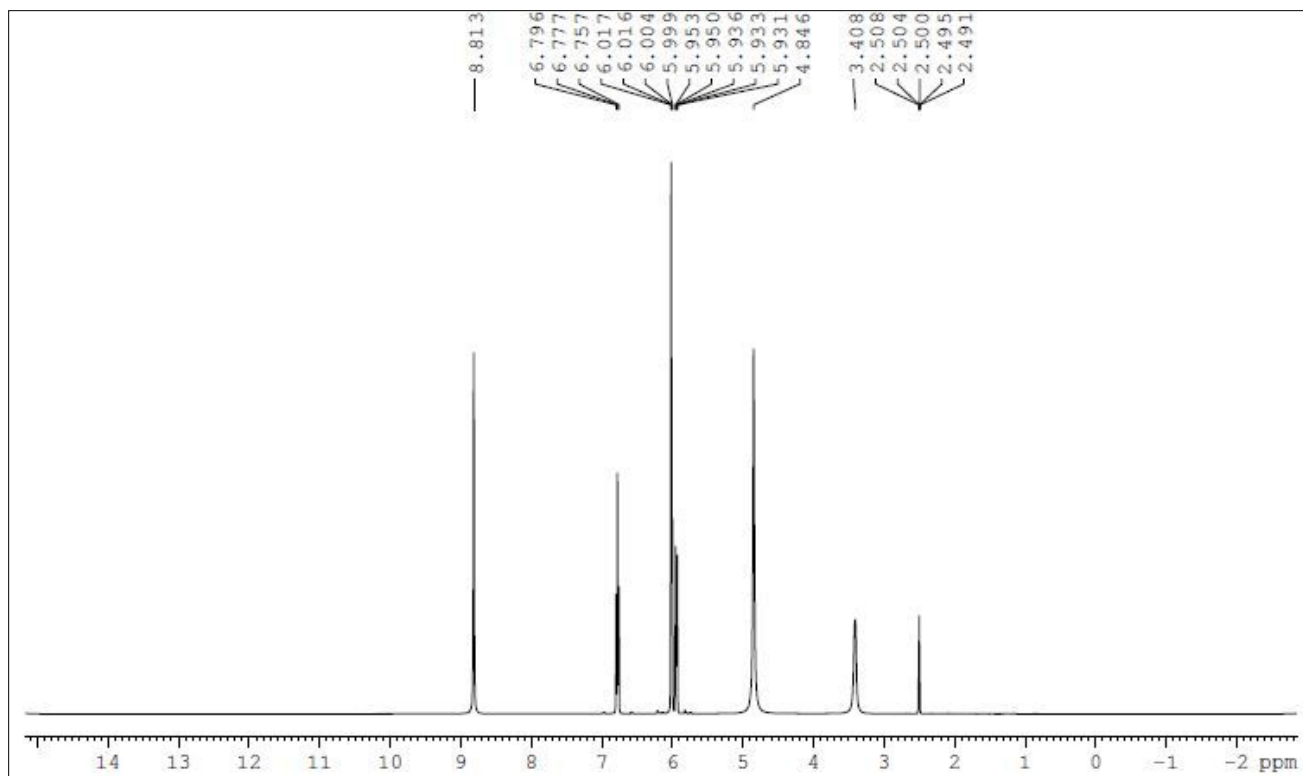

**Figure S12.** <sup>1</sup>H NMR spectrum of *m*-aminophenol

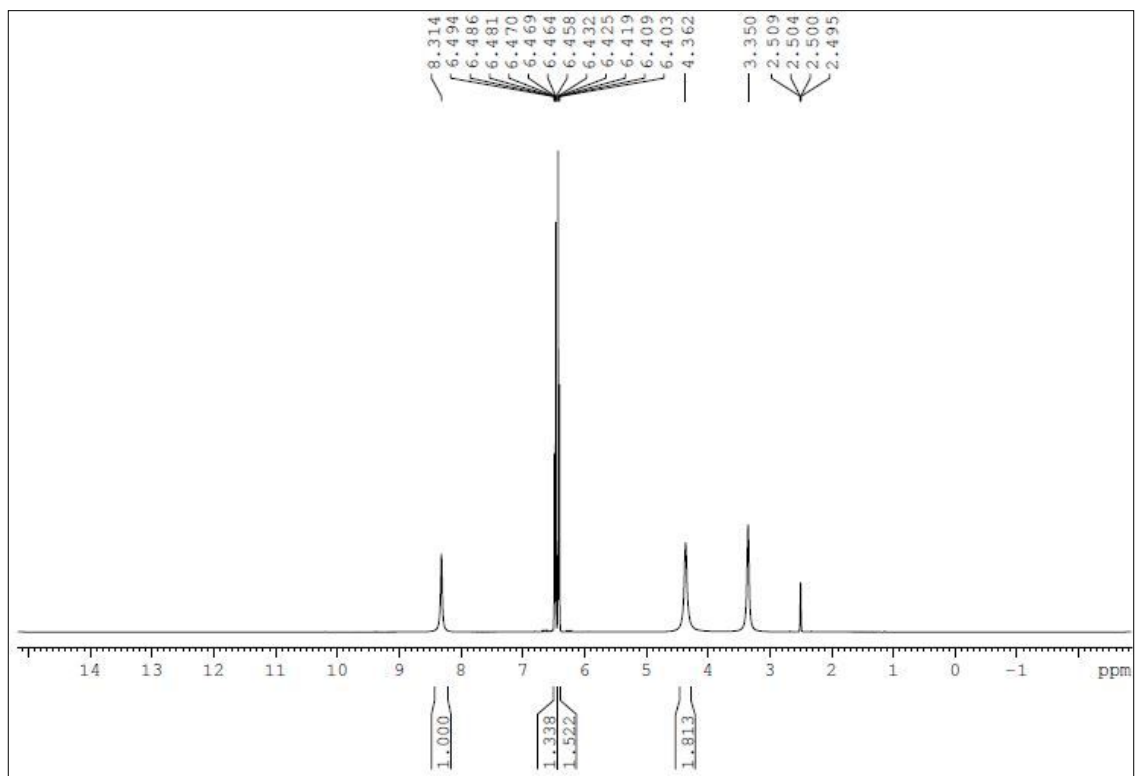

**Figure S13.** <sup>1</sup>H NMR spectrum of *p*-aminophenol

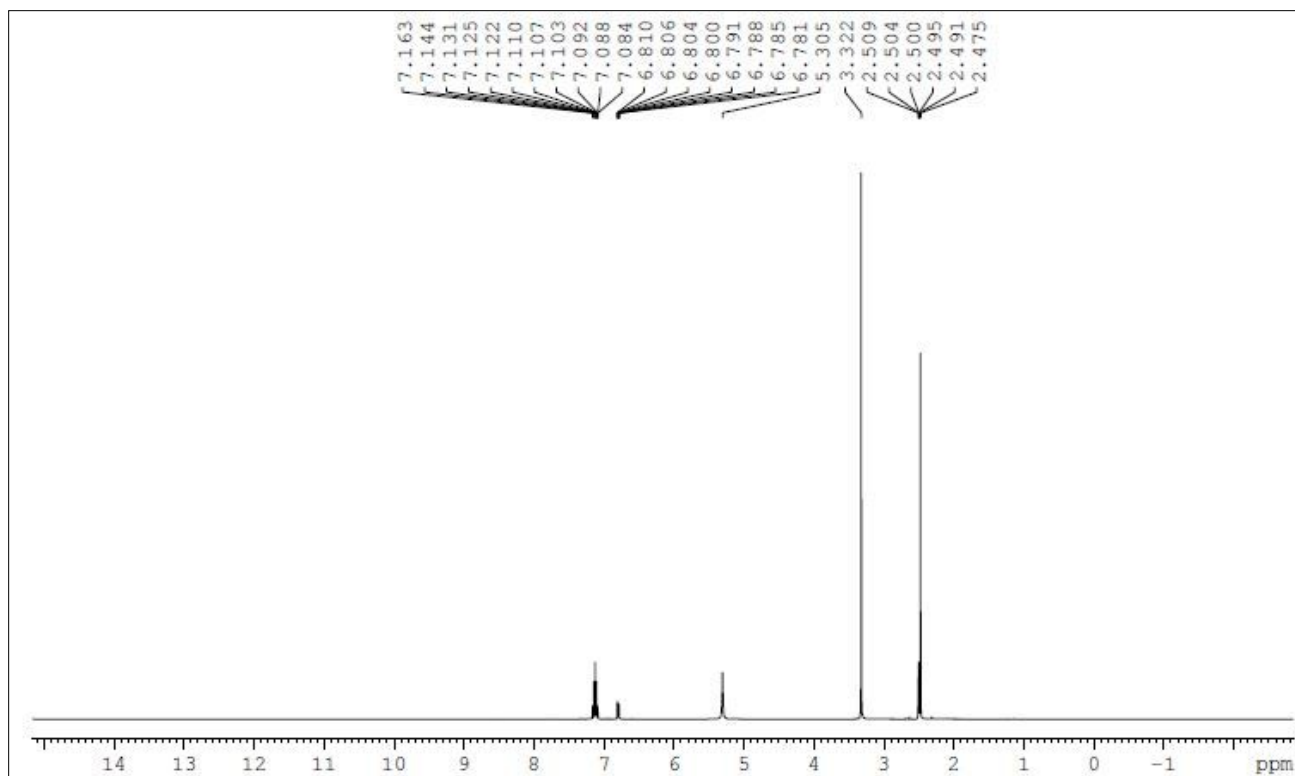

Figure S14. <sup>1</sup>H NMR spectrum of *m*-aminoacetophenone

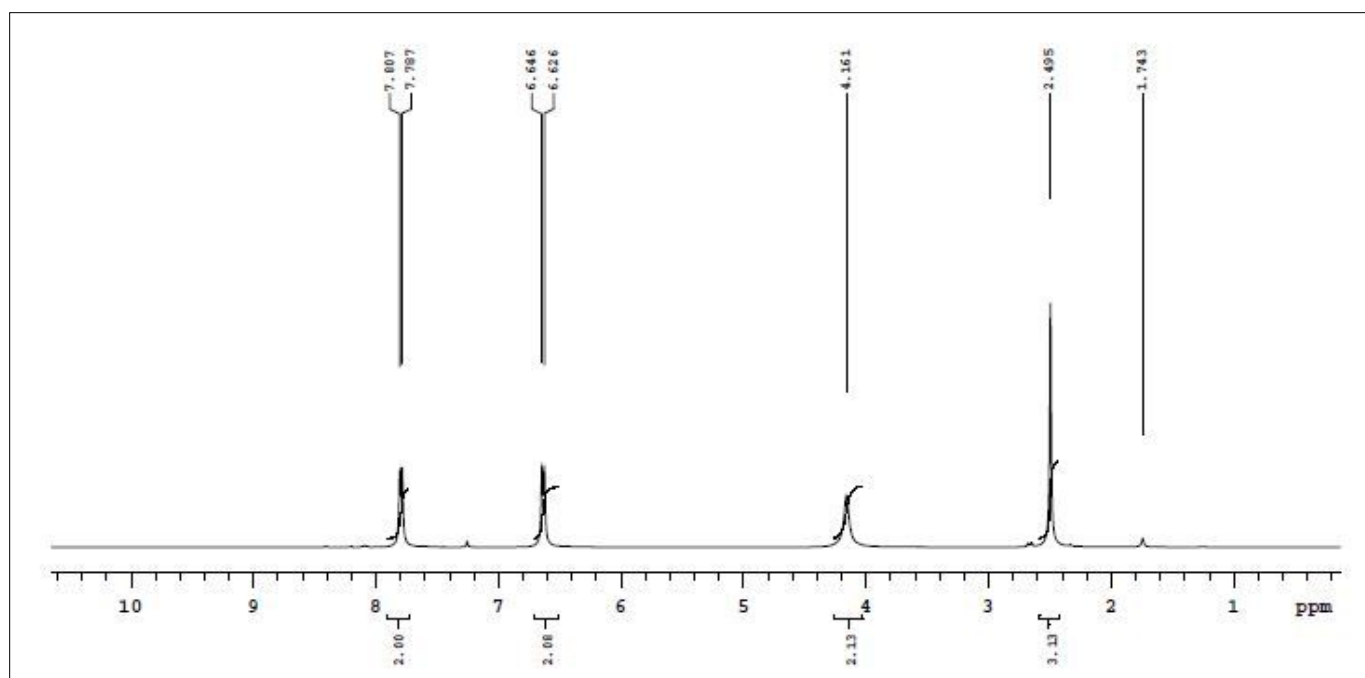

Figure S15. <sup>1</sup>H NMR spectrum of *p*-aminoacetophenone

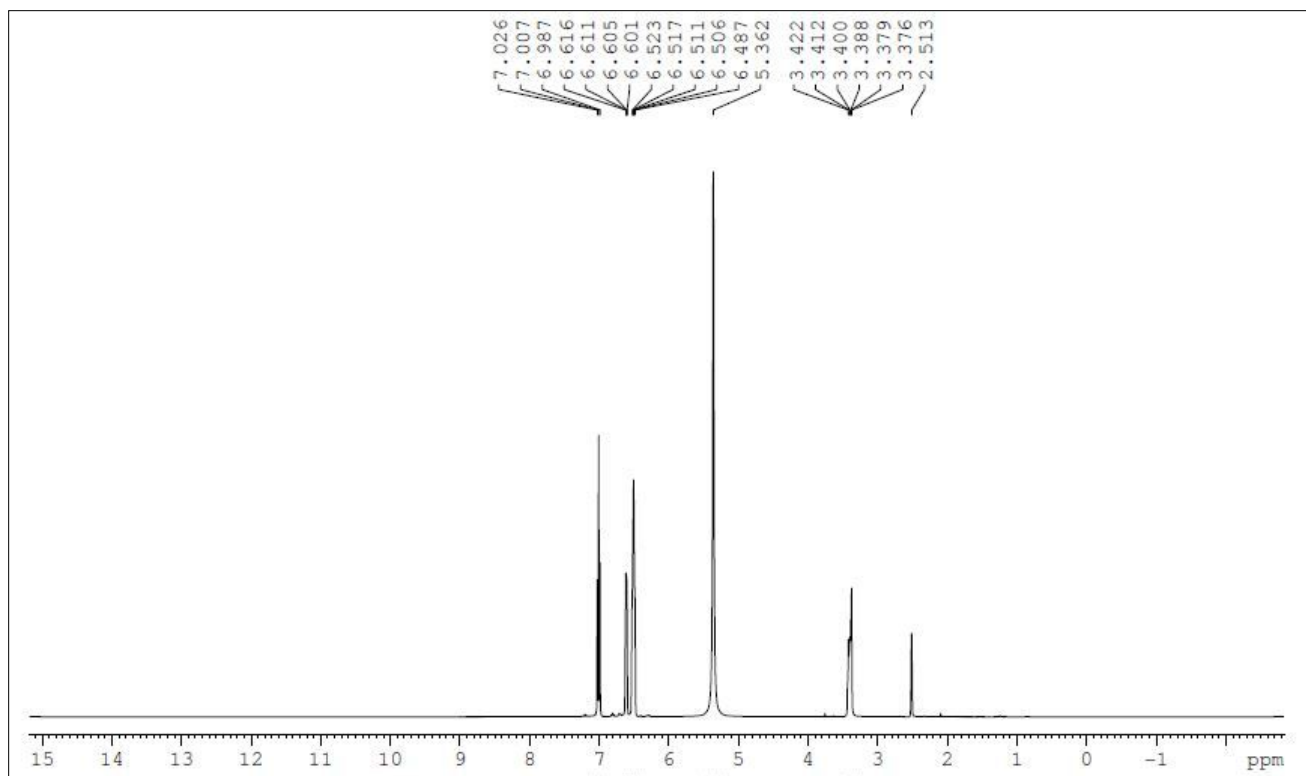

**Figure S16.** <sup>1</sup>H NMR spectrum of *m*-chloroaniline

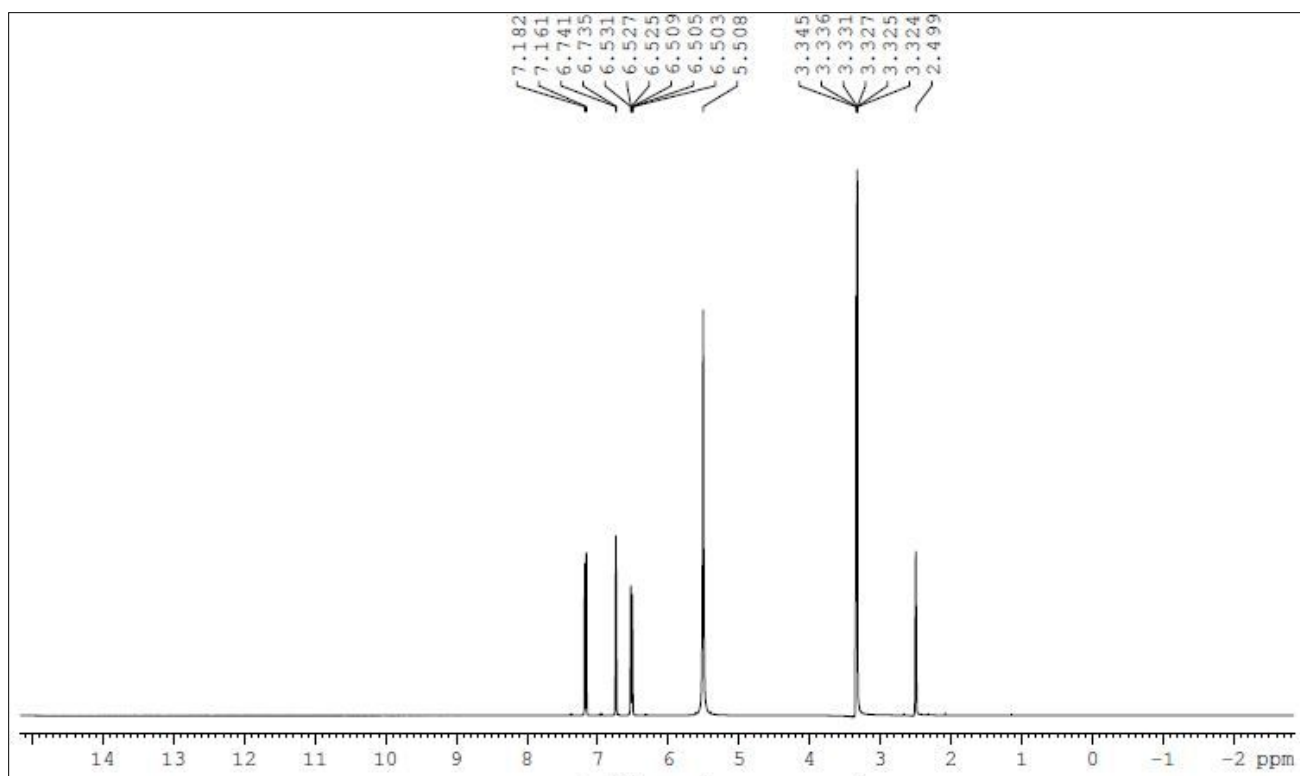

Figure S17. <sup>1</sup>H NMR spectrum of 3,4-dichloroaniline

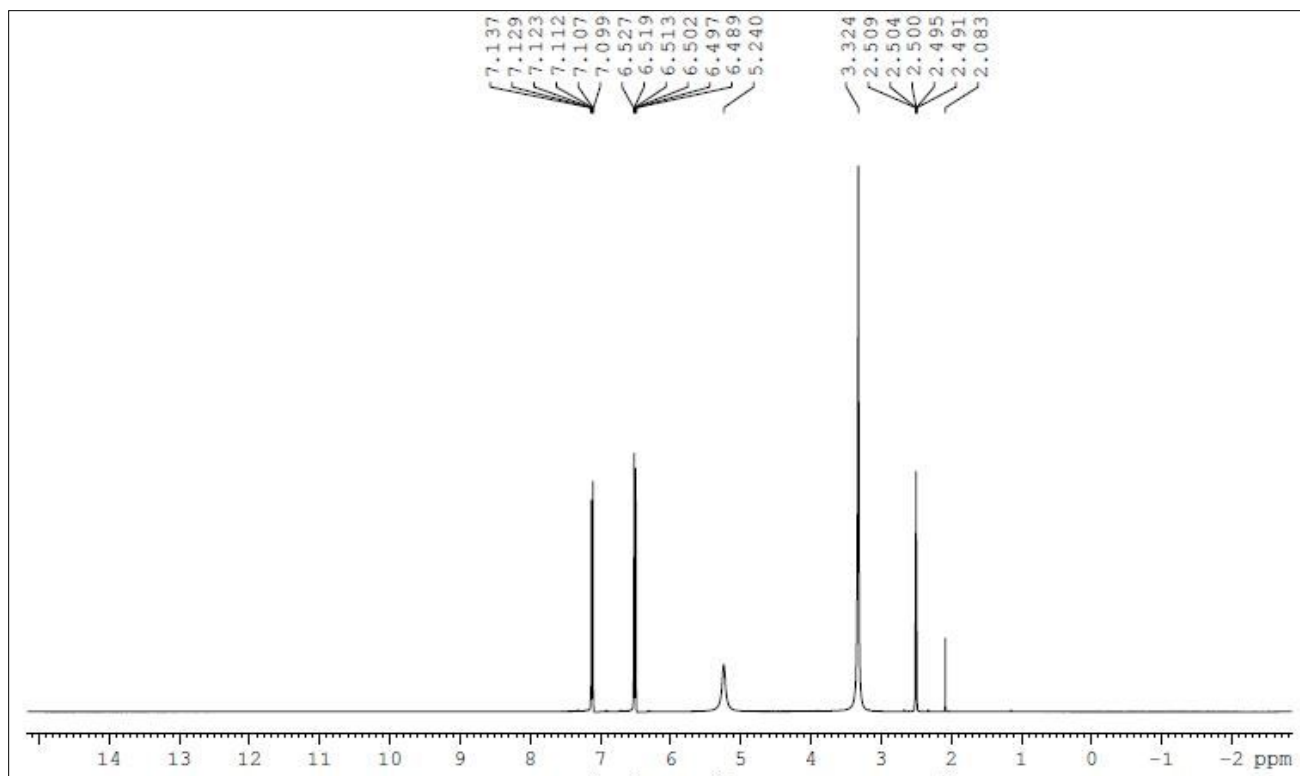

**Figure S18.** <sup>1</sup>H NMR spectrum of *p*-bromoaniline

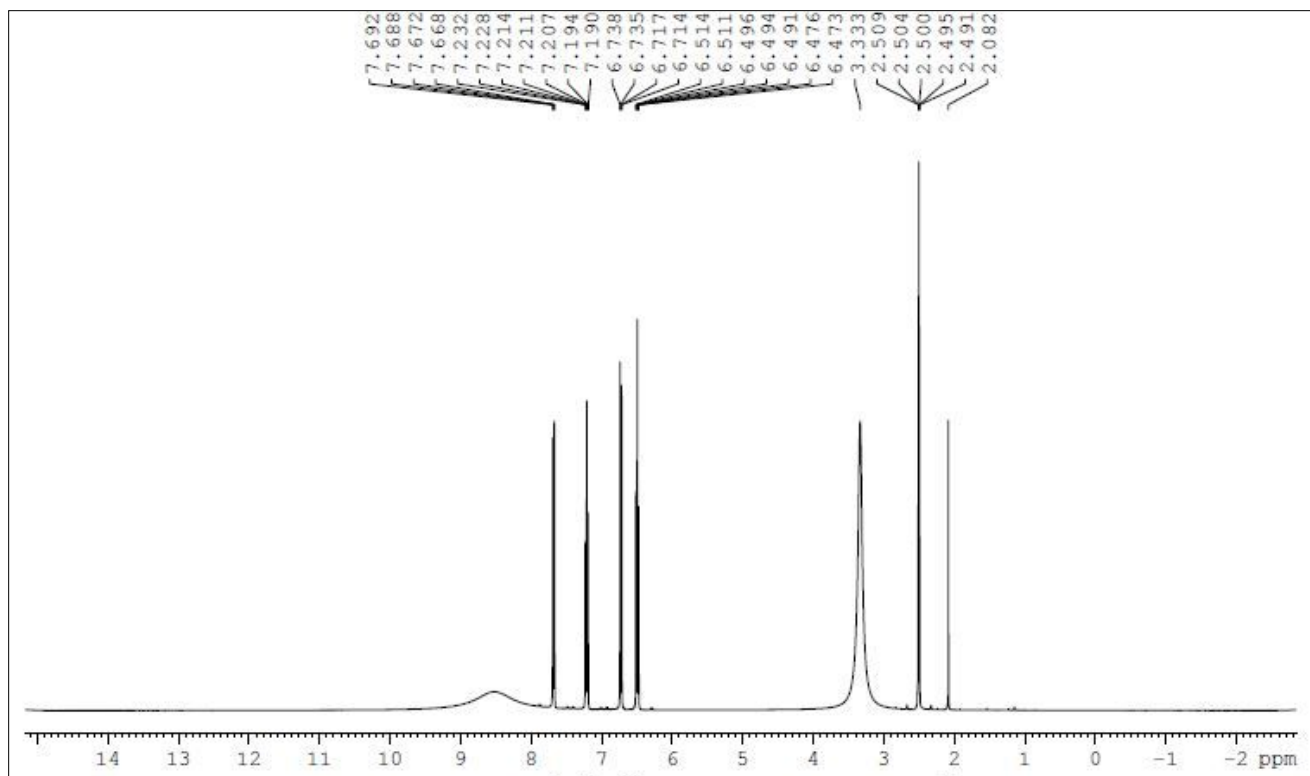

**Figure S19.** <sup>1</sup>H NMR spectrum of *o*-amino benzoic acid



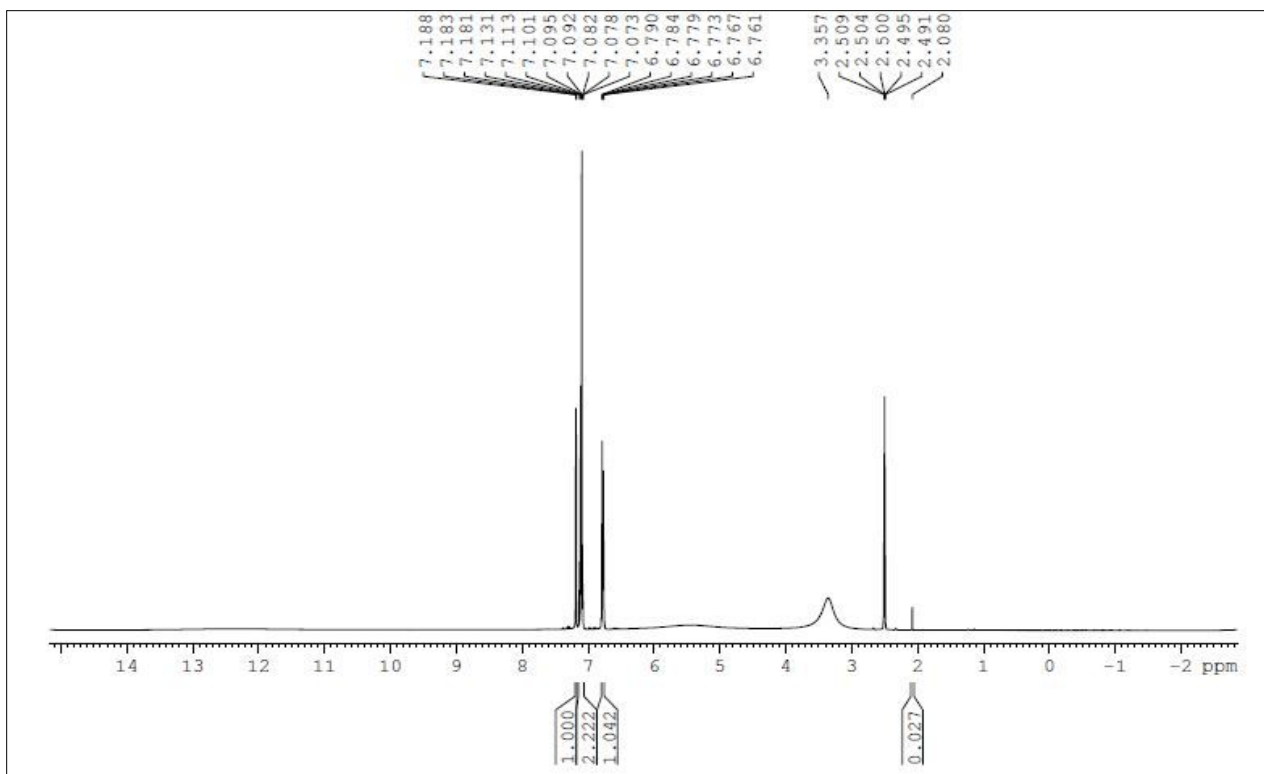

**Figure S20.** <sup>1</sup>H NMR spectrum of *m*-amino benzoic acid

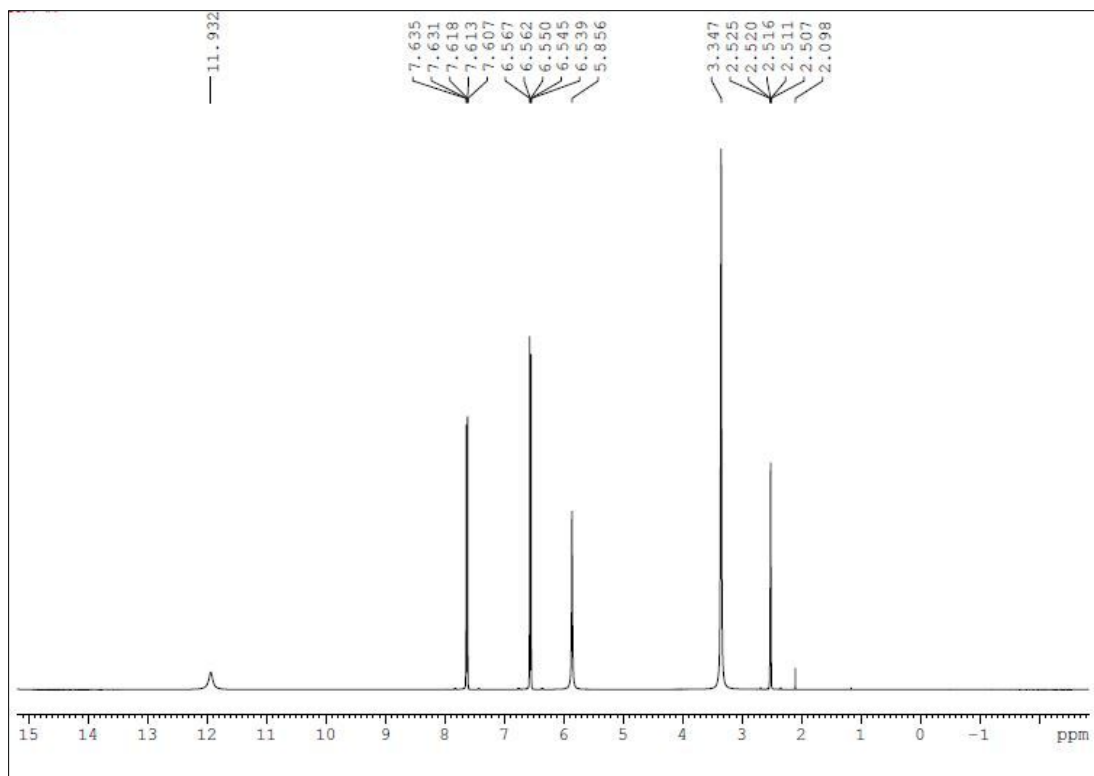

**Figure S21.**  $^1\text{H}$  NMR spectrum of *p*-amino benzoic acid

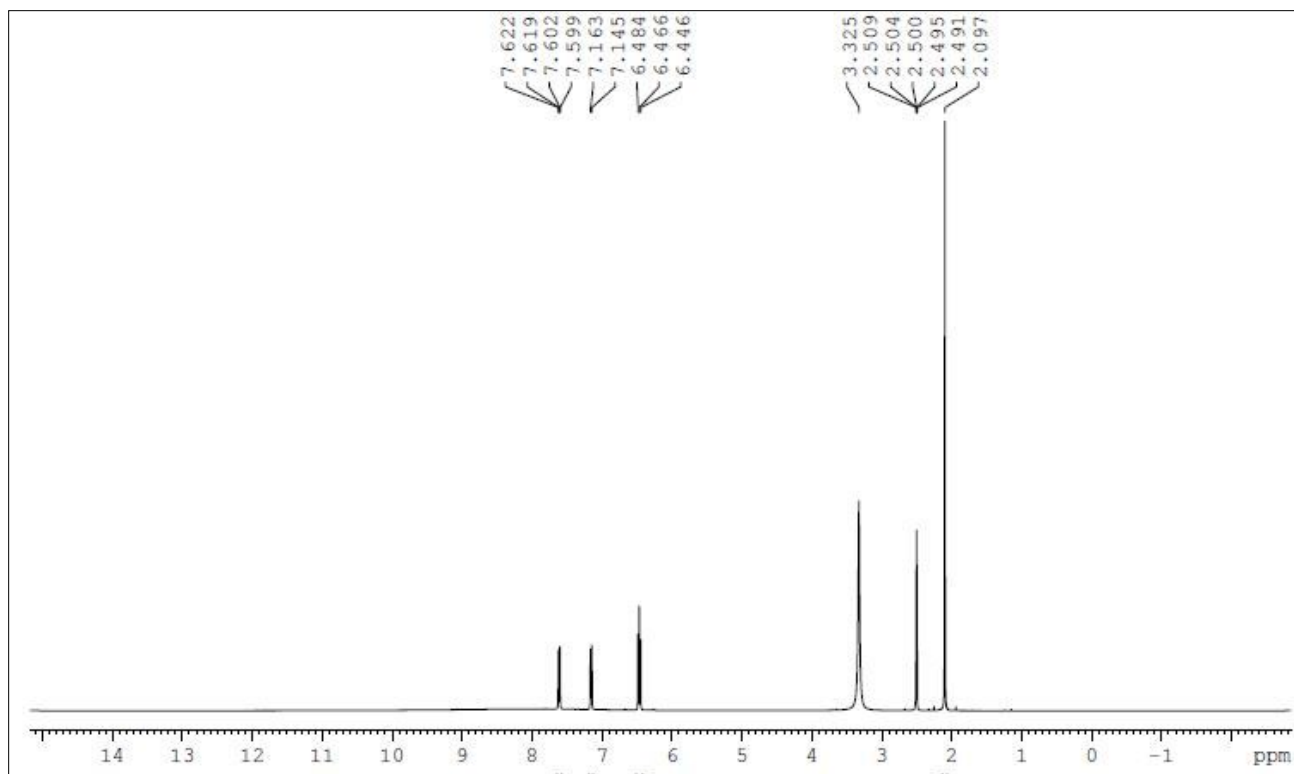

**Figure S22.** <sup>1</sup>H NMR spectrum of 3-methoxy-*o*-aminobenzoic acid
